# Supplementary material
Source: PubMed Central journal article supplement (PMC3898576)
Supplement: NIHMS482401-supplement-Supplementary.pdf [file NIHMS482401-supplement-Supplementary.pdf]

**Supplementary Figure 1**

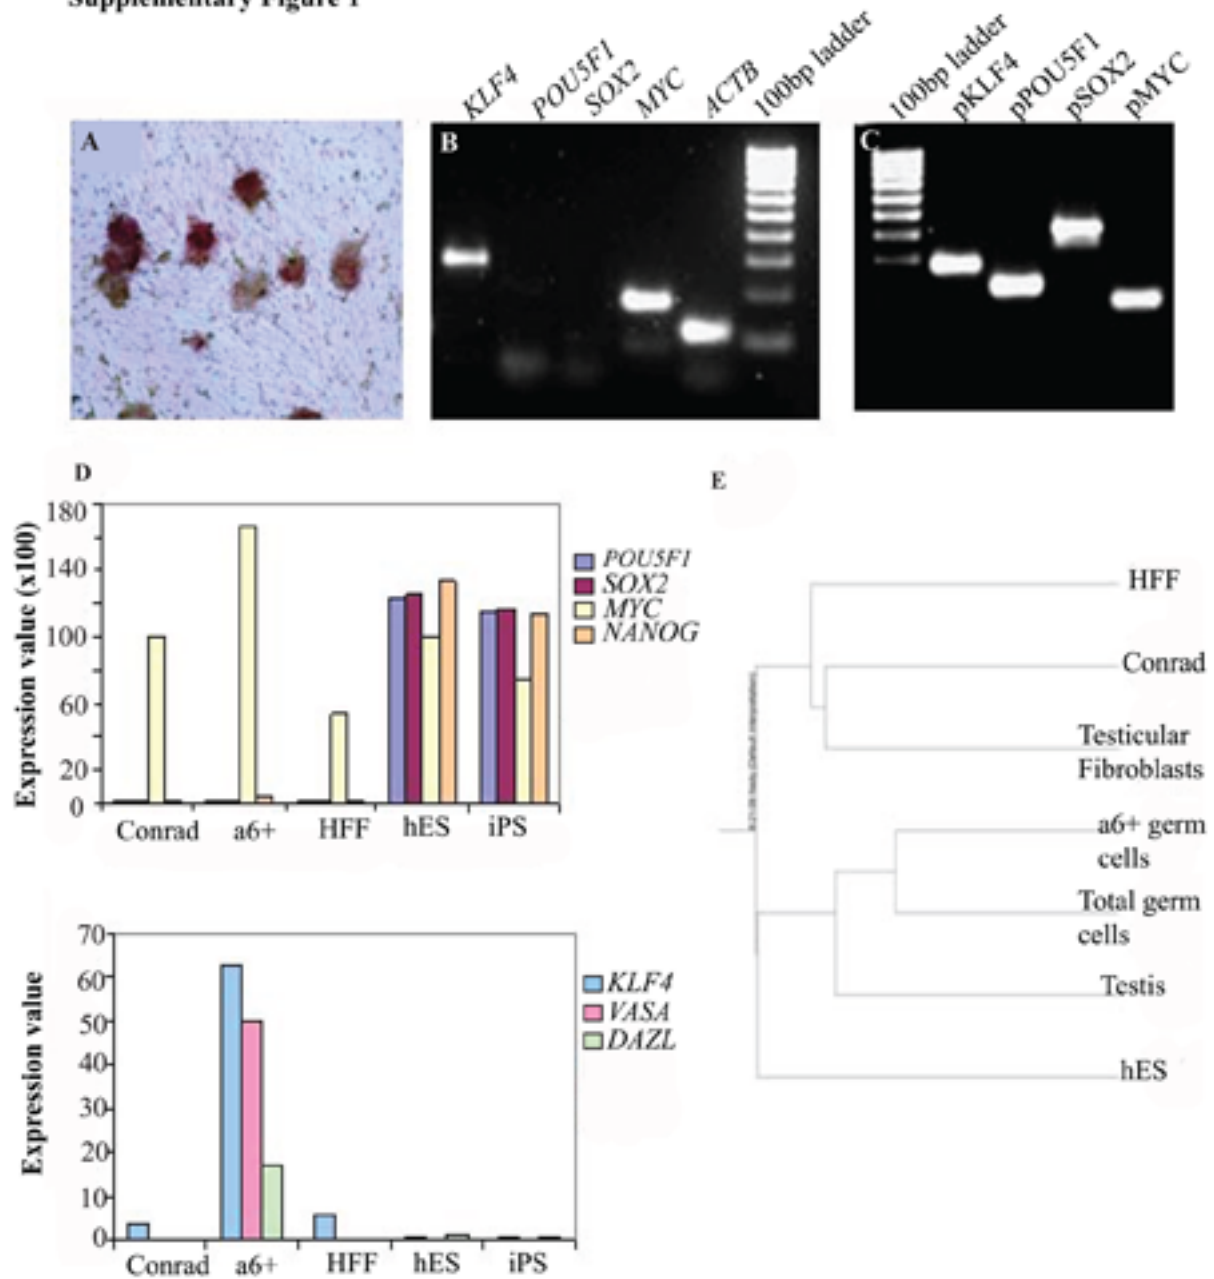

**Supplementary Figure 1.** Colonies prepared by the Conrad (Nature 2008) method grow among fibroblasts and express AP (A), but do not express the pluripotency markers *POU5F1* and *SOX2*, as determined by RT-PCR (B); (C), RT-PCR of the same genes assayed in (B), using the plasmids carrying the corresponding cDNAs, as a positive control; (D), Representative gene expression results from the microarray analysis comparing the expression of pluripotency (*POU5F1*, *SOX2*, *MYC*, *NANOG*, *KLF4*) and germ cell (*VASA*, *DAZL*) markers in the ES-like cells prepared by the Conrad protocol (ES-like), germ cells isolated by MACS with anti-ITGA6 (a6+), human foreskin fibroblasts (HFF), human ES cells (hES) and induced pluripotent cells (iPS). (E), Dendrogram representing the results of the global gene expression comparative analysis of the colonies prepared by the Conrad method, showing their similarity to human foreskin and testicular fibroblasts, as opposed to hES cells.

**Supplementary Table 1. Primers used in qRT-PCR**

|            |                                |
|------------|--------------------------------|
| SSEA-4 FOR | GAGAAGCTGTTCCAGATAGTGC         |
| SSEA-4 REV | CTCAGGGTACATGAAATGGTGG         |
| POU5F1 FOR | CTG TCT CCG TCA CCA CTC TG     |
| POU5F1 REV | TGT GTT CCC AAT TCC TTC CTT AG |
| KLF4 FOR   | AATTACCCATCCTTCCTGCCCGAT       |
| KLF4 REV   | ATCTGAGCGGGCGAATTTCCAT         |
| SOX2 FOR   | TGGACAGTTACGCGCACATGAA         |
| SOX2 REV   | AGTGCTGGGACATGTGAAGTCT         |
| MYC FOR    | AGCGACTCTGAGGAGGAACAAGAA       |
| MYC REV    | CGTAGTTGTGCTGATGTGTGGAGA       |
| NANOG FOR  | CCTGAACCTCAGCTACAAACAGGT       |
| NANOG REV  | CACACCATTGCTATTCTTCGGCCA       |
| PLZF FOR   | CTTCTGATAACGAGGCTGT            |
| PLZF REV   | GAGCCAGTAAGTGCATTCTCAG         |
| DAZL FOR   | GACGTGGATGTGCAGAAGATAG         |
| DAZL REV   | CATTCTGAAACTGTGGTGGAGG         |
| EPCAM FOR  | CTTCAGAAGGAGATCACAACGC         |
| EPCAM REV  | CAGGATCCAGATCCAGTTGTTC         |
| ITGA6 FOR  | GGATCATCCTAGTGGCTATTCTCG       |
| ITGA6 REV  | GGAACACTGTCATCGTACCTAGAG       |
| GPR125 FOR | TGTCTTCAGCGCATTGCTACCT         |
| GPR125 REV | TGCCACTTTCTGGAACACGGTA         |
| VASA FOR   | AACAGGATGTTCCCTGCATGGTTGG      |
| VASA REV   | CAAGTGCTCTTGCCCTTTCTGGT        |
| GAPDH FOR  | GAGTCAACGGATTTGGTCGTAT         |
| GAPDH REV  | AATGAAGGGGTCATTGATGG           |

**Supplementary Table 2. Antibodies used in this study****Primary Antibodies**

| <i>Antibody</i>            | <i>Host</i> | <i>Company</i> | <i>Application</i> |
|----------------------------|-------------|----------------|--------------------|
| SSEA-4 biotinylated        | Mouse       | R&D Systems    | MACS               |
| SSEA-4                     | Mouse       | Millipore      | ICC, IHC           |
| GPR125                     | Rabbit      | Abcam          | ICC, MACS          |
| EpCAM(CD326)-MicroBeads    |             | Miltenyi       | MACS               |
| ITGA6 (CD49f) biotinylated | Rat         | Biologend      | MACS               |
| UCH-L1                     | Rabbit      | AbD Serotec    | ICC                |
| VASA biotinylated          | Goat        | R&D Systems    | ICC                |

**Secondary Antibodies used in MACS**

(Miltenyi Biotec)

Anti-Biotin MicroBeads  
 Goat anti-Mouse IgG MicroBeads  
 Goat anti-Rabbit IgG MicroBeads

**Secondary Antibodies used in immunostaining**

|                            |        |                        |
|----------------------------|--------|------------------------|
| FITC-anti-mouse            | Donkey | Jackson Immunoresearch |
| TRITC-anti-mouse           | Donkey | Jackson Immunoresearch |
| FITC-anti-goat             | Donkey | Jackson Immunoresearch |
| Alexa Fluor568 anti-rabbit | Donkey | Invitrogen             |
